# Supplementary material for: Nano-chitosan boosts sesame plant anti-herbivore defenses and seed nutritional metabolites
Source: Royal Society of Chemistry journal article supplement (doi:10.1039/d3en00402c), 2023-12-13
Supplement: d3en00402c1.pdf [file d3en00402c1.pdf]

## Supporting information

### Nano-chitosan boosts sesame plant anti-herbivore defenses and seed nutritional metabolites

Zhenggao Xiao <sup>a</sup>, Haihua Ji <sup>a</sup>, Le Yue <sup>a</sup>, Feiran Chen<sup>a</sup>, Xiu-Ping Yan <sup>b</sup>, Zhenyu Wang  
<sup>a, c, \*</sup>, Sergio Rasmann <sup>d</sup>

<sup>a</sup> Institute of Environmental Processes and Pollution Control, School of Environment  
and Ecology, Jiangnan University, Wuxi 214122, China

<sup>b</sup> Institute of Analytical Food Safety, School of Food Science and Technology,  
Jiangnan University, Wuxi 214122, China

<sup>c</sup> Jiangsu Collaborative Innovation Center of Technology and Material of Water  
Treatment, Suzhou University of Science and Technology, Suzhou 215009, China

<sup>d</sup> Institute of Biology, University of Neuchatel, Neuchatel 2000, Switzerland

\* Corresponding author:

E-mail address: wang0628@jiangnan.edu.cn (Z. Wang)

**Number of pages: 20**

**Number of texts: 5**

**Number of tables: 3**

**Number of figures: 9**

## 25 **Supplementary method**

### 26 **Text S1. Measurement of leaf oxidative stress and antioxidant enzyme activity**

27 Leaf H<sub>2</sub>O<sub>2</sub> content was determined as described by previous study,<sup>1</sup> with slight  
28 modifications. Briefly, 100 mg of fresh leaf was homogenized in an ice bath with 1.5  
29 mL 0.1% (w/v) trichloroacetic acid, and then centrifuged at 12000 rpm at 4 °C for 15  
30 min and the supernatant collected. Afterward, 0.5 mL of the supernatant was added to  
31 0.5 mL of potassium phosphate buffer (10 mM, pH 7), and the absorbance of the  
32 supernatant was measured on a microplate reader (Varioskan Lux, Thermo, USA) at  
33 390 nm.

34 Leaf superoxide anion (O<sub>2</sub><sup>•-</sup>) content was analyzed according to the previously  
35 reported method with a slight modification.<sup>2</sup> Briefly, fresh leaf (100 mg) was ground  
36 in 1.5 mL cold potassium phosphate buffer (pH 7.8) and the mixtures were  
37 centrifugation at 12000 rpm at 4 °C for 10 min. The supernatant (1 mL) was added to  
38 phosphate buffer (0.9 mL) and hydroxylamine hydrochloride (0.1 mL) and the  
39 mixtures reacted for 30 min at 25 °C, then 17 mmol L<sup>-1</sup> sulfanilic acid (1 mL) and 7  
40 mmol L<sup>-1</sup> α-naphthylamine (1 mL) were added the reaction mixture and the solution  
41 was continues to react at 25 °C for 20min. The absorbance of the supernatant was  
42 measured on a microplate reader (Varioskan Lux, Thermo, USA) at 530 nm.

43 Leaf lipid peroxidation was estimated in terms of malondialdehyde (MDA)  
44 concentrations as described by previous studies,<sup>3, 4</sup> with a slight modification. Fresh  
45 leaves (100 mg) were homogenized in 1.5 mL of chilled 80% ethanol, and centrifuged  
46 at 12000 rpm at 4 °C for 20 min. The extract (1 mL) was then mixed with 4 mL  
47 aqueous solution of 20% trichloroacetic acid and the aqueous solution of 0.67% 2-  
48 thiobarbituric acid, incubated at 90 °C for 30 min. The reaction stopped by putting the  
49 tubes in an ice bath and then centrifuged at 12000 rpm for 30 min. The absorbance of  
50 the supernatant was recorded on a microplate reader (Varioskan Lux, Thermo, USA)  
51 at 440, 532 and 600 nm.

52 The activity of catalase (CAT), peroxidase (POD), and superoxide dismutase  
53 (SOD) in sesame leaves were determined according to a previous study with minor  
54 modification.<sup>5</sup> Briefly, Fresh leaves (100 mg) were ground in 50 mM pre-cooled PBS

55 (pH 7.8) containing 1% polyvinylpyrrolidone. The homogeneous was centrifuged  
56 (12000 rpm, 4 °C, 20 min), and the supernatants were enzyme extracts. SOD activity  
57 was determined by photochemical NBT method in 3 mL reaction mixture. The  
58 reaction mixture, including 50 mM PBS (pH 7.8), 75  $\mu$ M NBT, 10  $\mu$ M EDTA- $\text{Na}_2$ ,  
59 13.05 mM methionine, 2  $\mu$ M riboflavin, and 100  $\mu$ L enzyme extracts, was shaken and  
60 exposed to light for 20 min. Two hundred  $\mu$ L of the reaction mixture was transferred  
61 to a multifunctional microplate and measured on a microplate reader (Varioskan Lux,  
62 Thermo, USA) at 560 nm. One unit of SOD is defined as being present in the extract,  
63 which can inhibit by 50% of NBT photoreduction. POD activity was measured with  
64 guaiacol as the substrate. The absorbance of 200  $\mu$ L reaction mixture (20 mM  
65 potassium phosphate buffer (pH 6.0), 0.56% guaiacol, 0.01%  $\text{H}_2\text{O}_2$ , and 6.67  $\mu$ L  
66 enzyme extracts) was recorded for 3 min at 470 nm. The increase of 0.01 of OD value  
67 per min was defined as one unit of POD. For CAT activity, the absorbance of 200  $\mu$ L  
68 of the reaction mixture (15 mM phosphate buffer (pH 7.0), 0.05%  $\text{H}_2\text{O}_2$ , and 6.67  $\mu$ L  
69 enzyme extracts) was recorded for 3 min at 240 nm. The reduction of 0.01 of OD  
70 value per min was used as one unit of CAT.

71

## 72 **Text S2. Measurement of calcium ion fluxes by Non-invasive Micro-test** 73 **Technique system (NMT)**

74 The net fluxes of  $\text{Ca}^{2+}$  in leaf mesophyll cells was measured using Non-invasive  
75 Micro-test Technique system (NMT) (NMT100S-SIM-XY, Xuyue, Beijing, China) as  
76 previous studies described.<sup>6, 7</sup> Briefly, potassium chloride (0.1 M) was used for silver  
77 chloride, and then pre-pulled and moisturized microelectrodes (4-5  $\mu$ m, XY-DJ-01)  
78 were filled with the electrolyte solution ( $\text{Ca}^{2+}$ : 100 mM  $\text{CaCl}_2$ ) to a length of about 1.0  
79 cm followed by filling of selective liquid ion-exchange cocktails (LIXs,  $\text{Ca}^{2+}$ : XY-SJ-  
80 Ca, 40-50  $\mu$ m, Younger, USA). The microelectrodes were connected to the NMT  
81 system with a silver chloride wire and then calibrated in solutions with 0.1 and 0.05  
82 mM  $\text{CaCl}_2$  for  $\text{Ca}^{2+}$  flux (Nernstian slope  $28 \pm 5$  mV per decade). All measurements  
83 were recorded at least 75 times. Each treatment was measured using six biological  
84 replicates.  $\text{Ca}^{2+}$  fluxes were measured away from the cell surface about 1-2  $\mu$ m, and

85 the data were analyzed using imFluxes V2.2 software.

86

### 87 **Text S3. Determination of leaf phytohormones by HPLC-MS/MS**

88 The content of phytohormones (JA, SA, and ABA) in sesame leaves were  
89 determined according to a previous method,<sup>7</sup> with a slight modification. Briefly, 100  
90 mg sesame leaves were ground in liquid nitrogen and transferred into 1 mL of cold  
91 extraction solution (ethyl acetate containing 10  $\mu\text{g}\cdot\text{mL}^{-1}$  BHT-butylhydroxytoluene).  
92 The mixture was vortexed for 15 min, sonicated in an ice bath for 15 min, centrifuged  
93 at 12000 rpm for 10 min at 4 °C, and then transferred the supernatant to a new  
94 centrifuge tube. The solution was gently blown dry with nitrogen, reconstituted with  
95 200  $\mu\text{L}$  of 70% methanol, vortexed for 5 min, sonicated in an ice bath for 5 min, and  
96 centrifuged at 12000 rpm at 4°C for 10 min. Finally, pipette 100  $\mu\text{L}$  of the supernatant  
97 into the input sample for LC-MS/MS using an UHPLC system (Vanquish, Thermo  
98 Fisher Scientific, Germany). A standard solution of JA, SA, and ABA (Sigma-Aldrich,  
99 Switzerland) was measured every ten samples for quality control. The mobile phase A  
100 ( $\text{H}_2\text{O}$ , 0.01% formic acid) and B (acetonitrile, 0.01% formic acid formic acid in  
101 acetonitrile) were used for the elution gradient: 0 min, 5 % B; 1.5 min, 5 % B; 9 min,  
102 70 % B; 10 min, 70 % B; 10.1 min, 5 % B; 15 min, 5 % B. The flow rate and injection  
103 volume were 0.35  $\text{mL min}^{-1}$  and 5  $\mu\text{L}$ , respectively. The concentration of  
104 phytohormones was conducted by using a calibration equation obtained by linear  
105 regression from five calibration points for each analysis. The  $R^2$  value for the JA, SA,  
106 and ABA standard was 0.9992, 0.9984, and 0.9991, respectively.

107

### 108 **Text S4. Analysis of sesame leaf metabolites by HPLC-MS/MS**

109 The extraction and identification of sesame leaves metabolites were according to  
110 a previous study with a slight modification.<sup>8</sup> Briefly, sesame fresh leaves (100 mg)  
111 were powdered in liquid nitrogen and transferred to 2 mL tubes, and then added into  
112 1.5 mL of 80% methanol/water with 0.1% formic acid and 0.2 mg/L 2-chloro-L-  
113 phenylalanine as internal standard. Subsequently, the mixture was vortexed for 1 min  
114 and ultrasonicated for 30 min in ice, and then centrifuged at 4°C, 12000 rpm for 15

115 min. After that, the supernatant was freeze-dried and re-dissolved in 200  $\mu$ L solvent of  
116 methanol, acetonitrile, and water (4:4:2, v/v/v) followed by centrifuging at 4  $^{\circ}$ C,  
117 12000 rpm for 15 min. Eventually the supernatant was detected analyzed by LC-  
118 MS/MS (Thermo Fisher, Germering, Germany). The quality control (QC) samples  
119 were prepared with a mixture of the same amount of all samples. The mobile phase A  
120 ( $\text{H}_2\text{O}$ , 0.1% formic) and B (acetonitrile, 0.1% formic acid) were used for the elution  
121 gradient: 0 min, 5 % B; 1.5 min, 5% B; 10 min, 100 % B; 11min 100%B; 11.5 min, 5 %  
122 B; 14 min, 5 % B. The injection volume and the flow rate were 5  $\mu$ L and 0.35 mL  
123  $\text{min}^{-1}$ , respectively. The parameters of ESI were: sheath gas pressure, 35 arbitrary  
124 units; aux gas flow, 15 arbitrary units; sweep gas flow, 0 arbitrary units; capillary  
125 temperature, 320  $^{\circ}$ C; aux gas heater temperature, 350  $^{\circ}$ C. Spray voltage was 3.5 kV  
126 for ESI (pos) and -3.0 kV for ESI (neg).

127

#### 128 **Text S5 Measurements of the direct entomotoxic effect of potential anti-** 129 **herbivore compounds suspension**

130 To assess the direct entomotoxic effects of potential antiherbivore compounds,  
131 third-instar *S. litura* caterpillars were individually reared on the potential  
132 antiherbivore compound solution (5 mg/kg, 10 mg/kg, 50 mg/kg, 100 mg/kg, and 200  
133 mg/kg), or on the artificial diet added with isovolumetric deionized water, as control.  
134 Larval weight was recorded before placing the larvae on the diet (Time = 0 h), then in  
135 turn at 12 h, 24 h, 48 h, and 72 h after the onset of the experiment.

136

137 **Table S1. Primer sets used in this study**

| Gene            | Forward Sequence (5' to 3') | Reverse Sequence (5' to 3') | References         |
|-----------------|-----------------------------|-----------------------------|--------------------|
| <i>PAL</i>      | GCCTGTTAGAAAACCAGTCCCTA     | GCTGGAAAGCGGGAGACC          | <a href="#">9</a>  |
| <i>C4H</i>      | AGTGGGTCACTCATTCTGGTT       | GCTTCTTCTGGATCTCCGG         | <a href="#">9</a>  |
| <i>COMT</i>     | TGTGATCCACTGCTACCCGA        | TGTCCTGTGCTTTCCCTTAGTC      | <a href="#">9</a>  |
| <i>4CL</i>      | TCTCCCCTTGCAATTCTTACTG      | TCTTCTTGAAACCAACTCCACTT     | <a href="#">9</a>  |
| <i>CCR</i>      | TCGGGGATGAGAAAGAGACC        | CGATGGAATCATAGTCAAGCAA      | <a href="#">9</a>  |
| <i>HCT</i>      | AGGATTATGCTCTGCCCAA         | GTTGCAATCGCAGCTCAGT         | <a href="#">9</a>  |
| <i>C3H</i>      | CGGCCTCCTTTGGGATATGA        | GGTCACTACCAACCACTCGG        | Gene ID: 105162700 |
| <i>CCoAOMT</i>  | CCCCACGATGCCAAGATACT        | GTAGCCGATCACACCACCAA        | <a href="#">9</a>  |
| <i>CAD</i>      | TACCGGTATTCCACCCGTTG        | GTTATGCTTTTCCTCCCGAGC       | Gene ID: 105169503 |
| <i>DIR</i>      | CCGGATGATGTTCACTCGCT        | GACCCACCGATGATGTTGT         | Gene ID: 105170376 |
| <i>CYP81Q1</i>  | CGCGGAAGACGGATGAGT          | GATTCCTGCAACGAAAGCAAA       | <a href="#">10</a> |
| <i>CYP92B14</i> | TCGATTACTCAGACGTGACATGG     | GGCTTTCCTGATAGGGAGTGTAG     | <a href="#">10</a> |
| <i>DXS</i>      | GCGATCGATTACATACTCTTTGC     | GTGGGAATATACGGAGGGGC        | Gene ID: 105165070 |
| <i>MCS</i>      | GAAGCTCACTCTGATGGTGATGT     | GGGCTGACCTTTGGTCTTTG        | Gene ID: 105164054 |

|               |                        |                             |                    |
|---------------|------------------------|-----------------------------|--------------------|
| <i>HDR</i>    | GCGCAAGTATGGGGTCGAAA   | CCACCAACTCACCATGCATCA       | Gene ID: 105169604 |
| <i>GPPS</i>   | GACCGAATAGCCGTCGTCAT   | GGATTGGCGGTCAGAGGAAA        | Gene ID: 105175753 |
| <i>CDPK11</i> | GGAATTATGTGCTGGCGGC    | CATCAGAAAGATACTGTCCAGG<br>T | Gene ID: 105159534 |
| <i>CDPK29</i> | GTTCTTTCCTTATCCAGGCCGA | GTTGCAATCGCAGCTCAGT         | Gene ID: 105165972 |
| <i>Actin</i>  | GTTGGTCTCTTTGAGGAC     | CAGCTGGATGTCTTTTGG          | <a href="#">11</a> |

---

139 **Table S2.** Average hydrodynamic particle diameters (nm) and zeta potentials ( $\zeta$ ) of  
 140 CNPs at different dose (50, 100, 200 mg/L). Data was shown as means  $\pm$  SD (n = 5).

| Materials                           | Dose (mg/L) | Particle mean size (nm) | Zeta potential (mV) |
|-------------------------------------|-------------|-------------------------|---------------------|
| Chitosan<br>nanoparticles<br>(CNPs) | 50          | 155.3 $\pm$ 11.0        | 41.3 $\pm$ 3.1      |
|                                     | 100         | 178.9 $\pm$ 14.8        | 38.4 $\pm$ 4.2      |
|                                     | 200         | 266.6 $\pm$ 22.0        | 35.0 $\pm$ 4.8      |

141

142 **Table S3.** Two-way ANOVA results table showing the interactive effects of chitosan and herbivore treatment (*S. litura*) on sesame plant growth,  
143 oxidative stress, antioxidant enzyme, Ca<sup>2+</sup> and phytohormones. The test results are shown with the test statistic F-value and significance levels  
144 (\*\**p* < 0.001, \*\**p* < 0.01, \**p* < 0.05 and <sup>NS</sup>*p* > 0.05)

| Plant traits                       | Data transformation | Chitosan          | Herbivore         | Chitosan × Herbivore |
|------------------------------------|---------------------|-------------------|-------------------|----------------------|
| Shoot biomass                      | Non                 | 7.4 ***           | 14.3 ***          | 0.3 <sup>NS</sup>    |
| Root biomass                       | Log                 | 1.6 <sup>NS</sup> | 2.5 <sup>NS</sup> | 0.7 <sup>NS</sup>    |
| Leaf Chlorophyll                   | Non                 | 30.2 ***          | 30.0 ***          | 1.9 <sup>NS</sup>    |
| Leaf H <sub>2</sub> O <sub>2</sub> | Log                 | 2.7 <sup>NS</sup> | 258.1 ***         | 6.0 **               |
| Leaf O <sub>2</sub> <sup>·-</sup>  | Non                 | 16.1 ***          | 0.5 <sup>NS</sup> | 3.5 *                |
| Leaf MDA                           | Non                 | 1.6 <sup>NS</sup> | 18.3 ***          | 4.6 **               |
| Leaf SOD                           | Non                 | 122.3 ***         | 272.0 ***         | 2.8 <sup>NS</sup>    |
| Leaf POD                           | Log                 | 40.0 ***          | 85.2 ***          | 3.7 *                |
| Leaf CAT                           | Log                 | 33.5 ***          | 494.1 ***         | 4.5 **               |
| Leaf Ca <sup>2+</sup>              | Log                 | 136.5 ***         | 112.3 ***         | 9.8 ***              |
| Leaf JA                            | Log                 | 34.7 ***          | 619.2 ***         | 0.4 <sup>NS</sup>    |
| Leaf SA                            | Non                 | 15.6 ***          | 108.3 ***         | 3.9 *                |
| Leaf ABA                           | Non                 | 7.7 **            | 225.2 ***         | 6.6 **               |

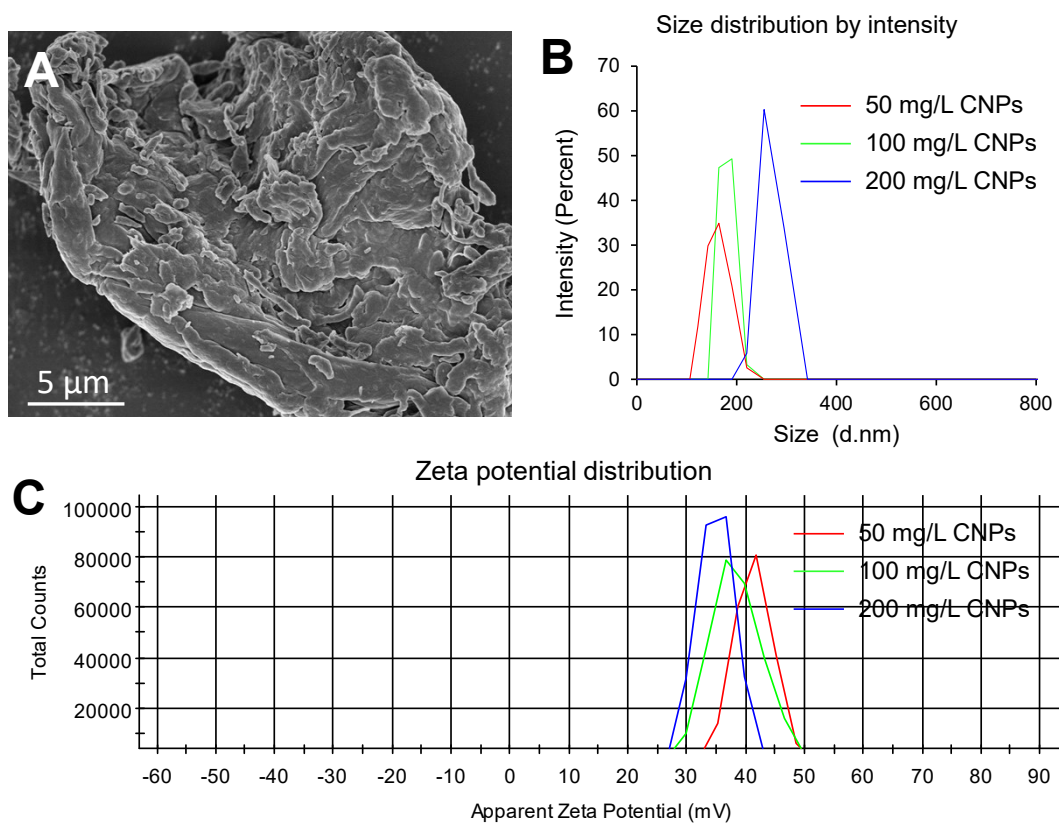

146  
 147 **Fig. S1** SEM analysis of bulk chitosan (A). Particle size distribution (B) by intensity  
 148 and Zeta potential distribution (C) of CNPs at the dose of 50, 100, 200 mg/L,  
 149 respectively.

150

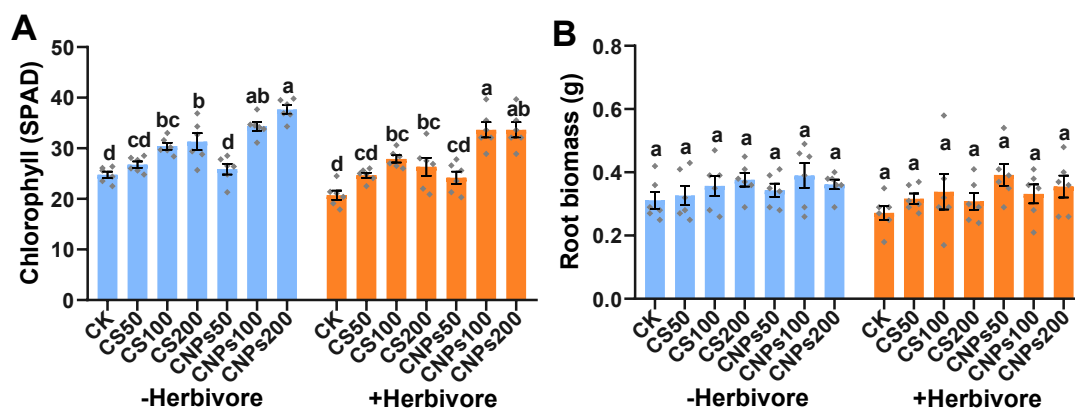

151

152 **Fig. S2** Effect of CNPs on sesame plant growth functional traits. (A) Sesame leaf  
 153 chlorophyll and (B) root biomass in the absence (-Herbivore, blue bars) and presence  
 154 (+Herbivore, orange bars) of *S. litura* caterpillars. Data are means  $\pm$  SE (n = 6).  
 155 Significant differences among the treatments are marked with different lowercase  
 156 letters in the absence and presence of *S. litura*, respectively (Tukey's HSD test,  $p <$   
 157 0.05).

158

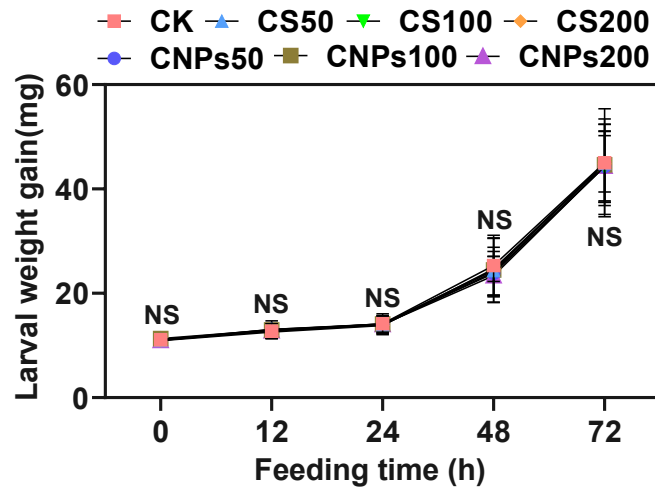

159

160 **Fig. S3** Toxicity bioassay. Dot plots show the growth of *S. litura* caterpillars feeding  
 161 on artificial diet added with different concentration (CK = control, 50, 100, and 200  
 162 mg/kg) of bulk chitosan (CS) and chitosan nanoparticles (CNPs) during a 72 h  
 163 feeding period. Data are means  $\pm$  SE (n = 10) (Tukey's HSD test,  $p < 0.05$ , NS, Non-  
 164 significance).

165

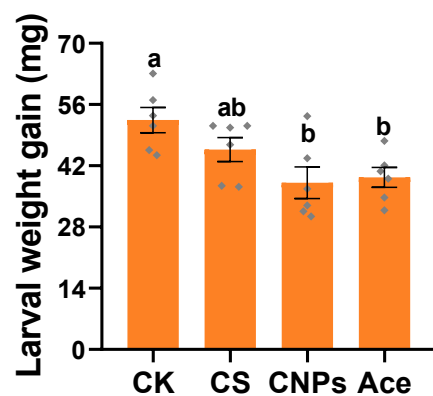

166

167 **Fig. S4** *S. litura* larval growth on sesame leaves exposed to CNPs. Chitosan  
 168 treatments include CK, control plants; CS, bulk chitosan; CNPs, chitosan  
 169 nanoparticles. Data are means  $\pm$  SE (n = 6). Significant differences between the  
 170 treatments are marked with different lowercase letters (Tukey's HSD test,  $p < 0.05$ ).

171

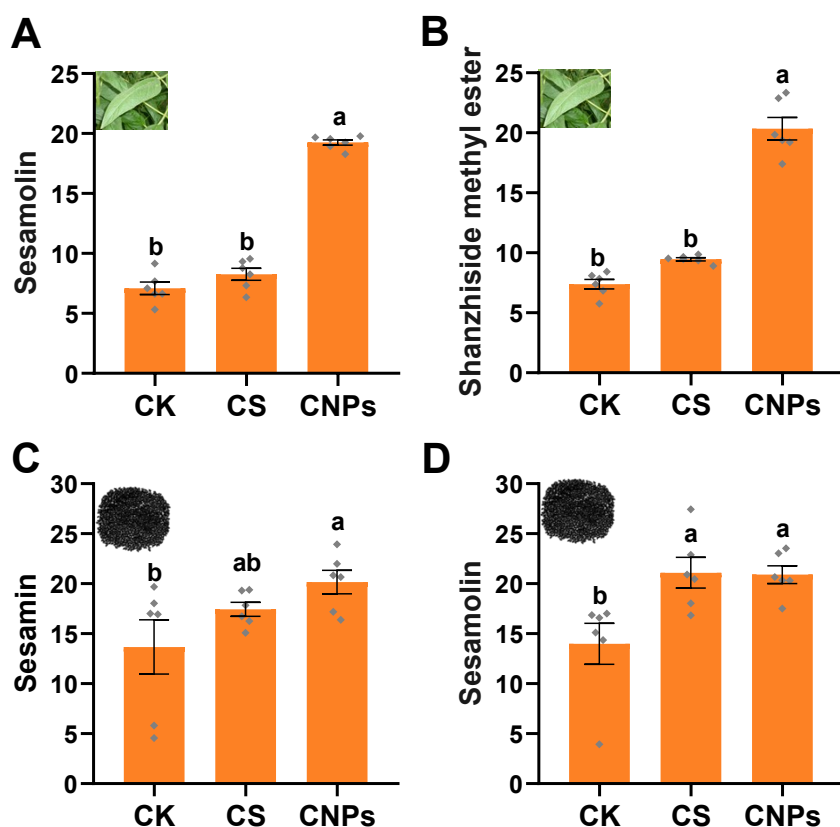

172  
 173 **Fig. S5** The relative abundance of metabolites in sesame plants exposed to CNPs in  
 174 response to herbivory. (A) Sesamol and (B) shanzhiside methyl ester in leaves; (C)  
 175 sesamin and (D) sesamol in seeds. Chitosan treatments include CK, control plants;  
 176 CS, bulk chitosan; CNPs, chitosan nanoparticles. Data are means  $\pm$  SE (n = 6).  
 177 Significant differences among the treatments are marked with different lowercase  
 178 letters (Tukey's HSD test,  $p < 0.05$ ).  
 179

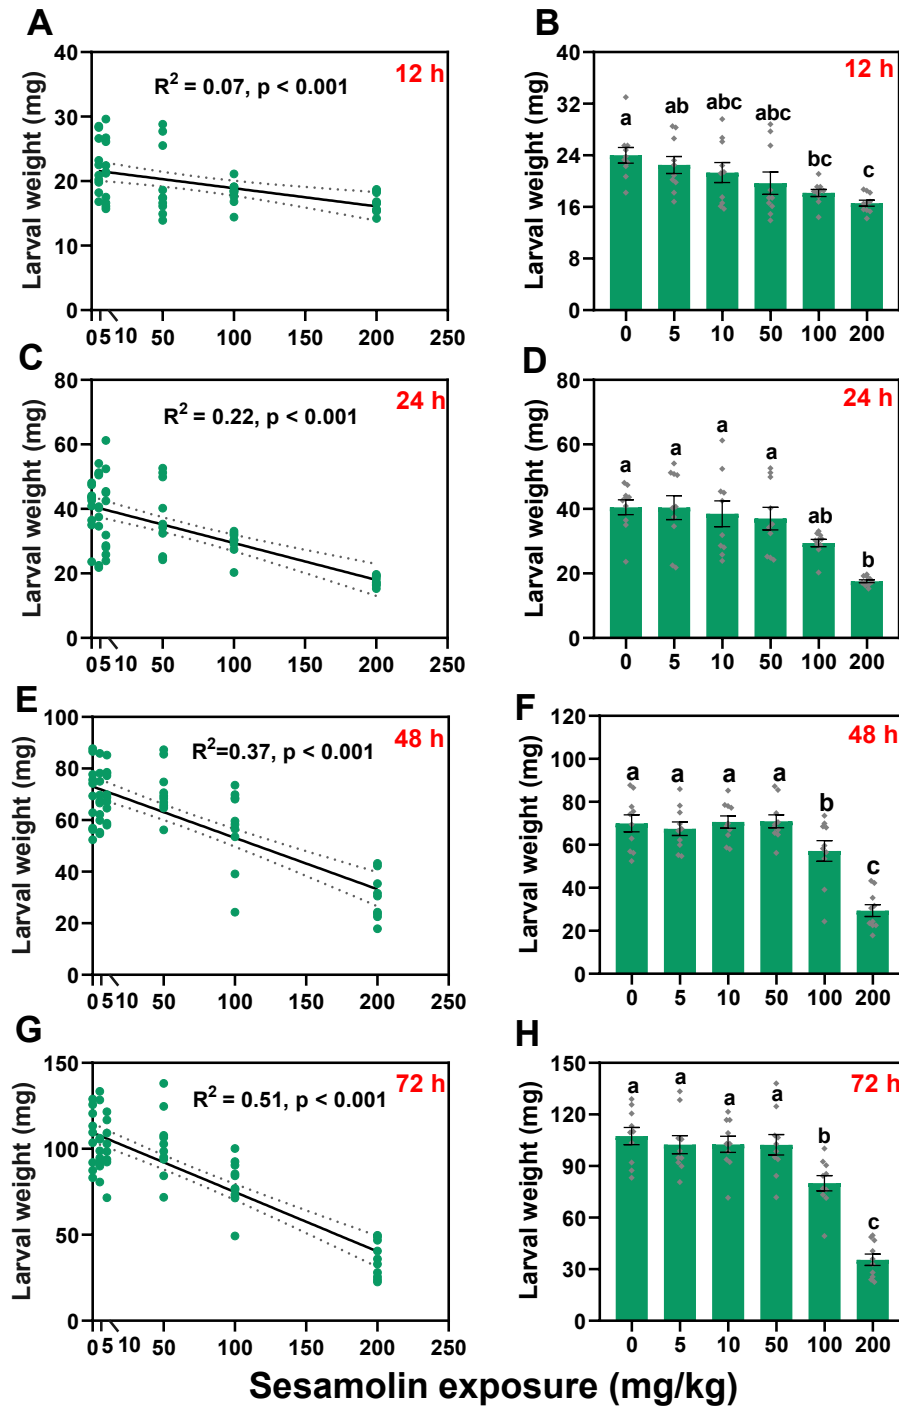

180

181 **Fig. S6** Toxicity bioassay. Sesamolin-mediated toxicity effects on *S. litura* larval  
 182 weight and the *in vitro* feeding experiment with artificial diet within 72 h feeding  
 183 period exposed to sesamolin with various doses (0, 5, 10, 50, 100 and 200 mg/kg).  
 184 Data are means  $\pm$  SE ( $n = 10$ ). Significant differences among the treatments are  
 185 marked with different lowercase letters (Tukey's HSD test,  $p < 0.05$ ).

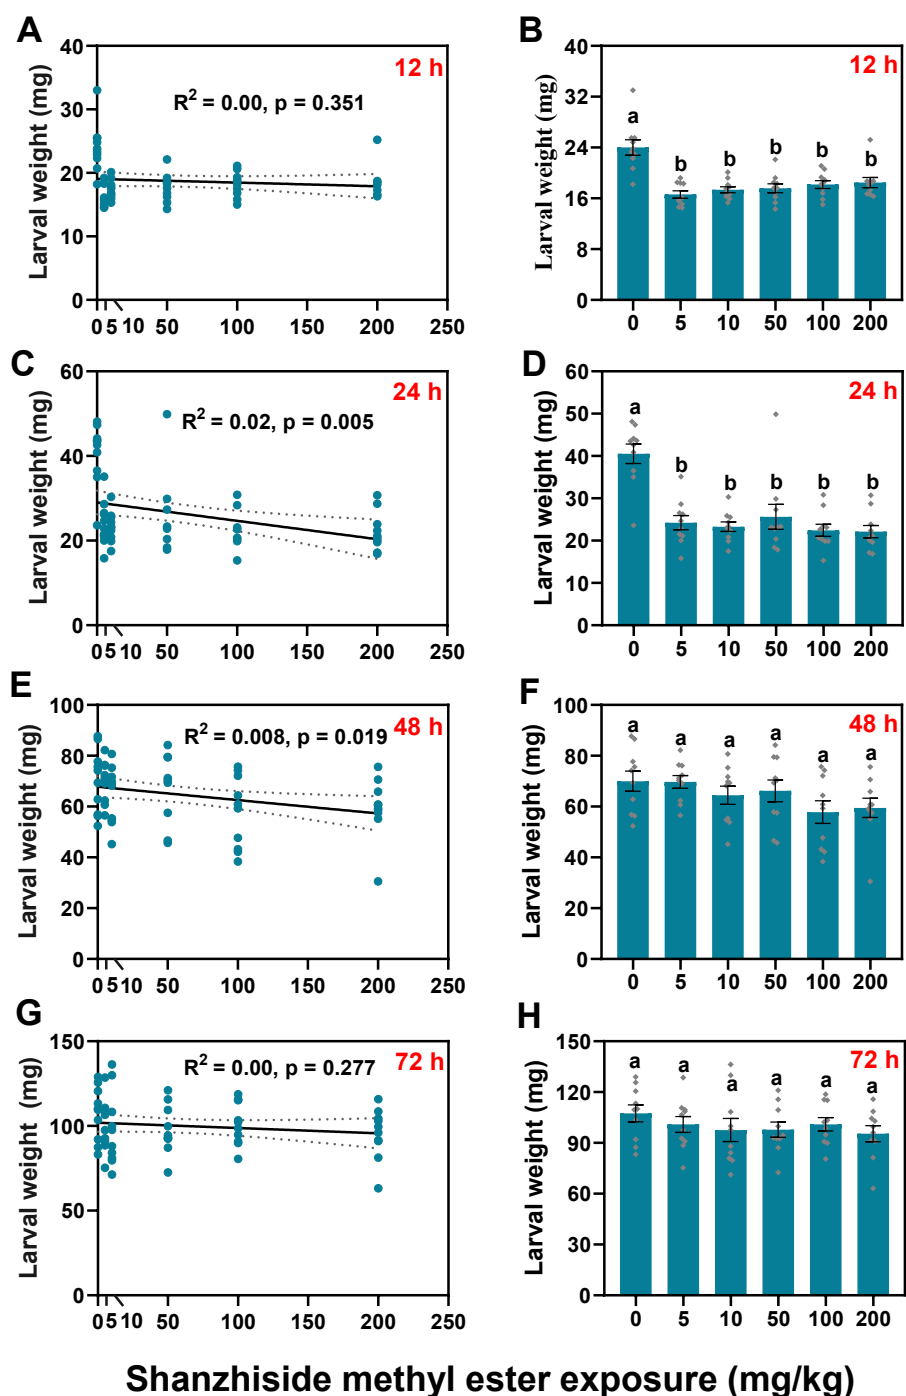

186

187 **Fig. S7** Toxicity bioassay. Shanzhiside methyl ester-mediated toxicity effects on *S.*  
 188 *litura* larval weight and the *in vitro* feeding experiment with artificial diet within 72 h  
 189 feeding period exposed to shanzhiside methyl ester with various doses (0, 5, 10, 50,  
 190 100 and 200 mg/kg). Data are means  $\pm$  SE ( $n = 10$ ). Significant differences among the  
 191 treatments are marked with different lowercase letters (Tukey's HSD test,  $p < 0.05$ ).

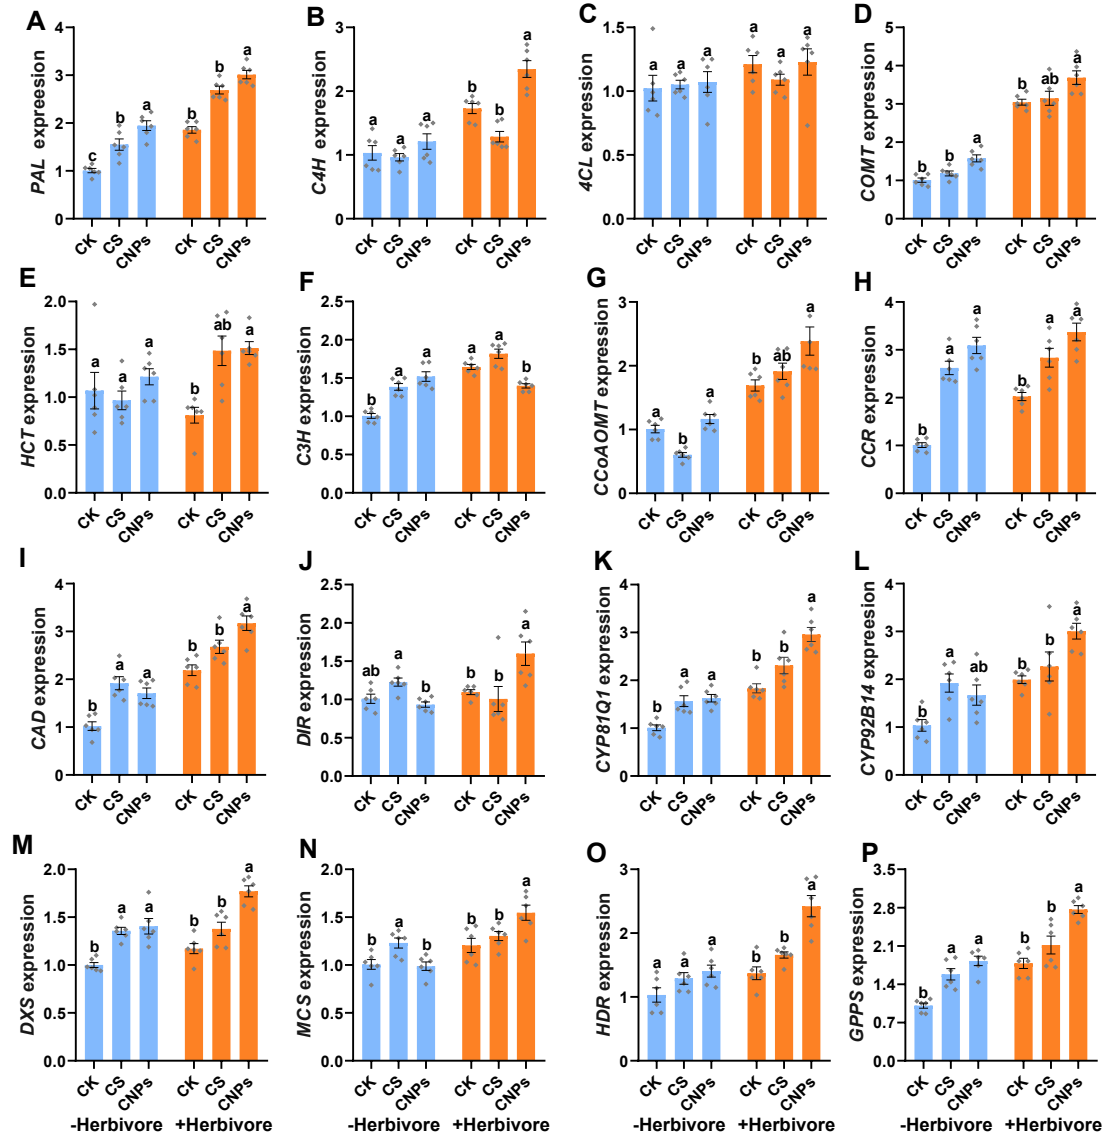

192

193 **Fig. S8** Effect of CNPs on the biosynthesis gene expression of defense compounds.  
 194 Shown is the relative expression of genes: (A-L) sesamol and (M-P) shanzhiside  
 195 methyl ester in sesame leaves in sesame leaves in the absence (-Herbivore, blue bars)  
 196 and presence (+Herbivore, orange bars) of *S. litura* caterpillars. Data are means  $\pm$  SE  
 197 (n = 6). Chitosan treatments include CK, control plants; CS, bulk chitosan; CNPs,  
 198 chitosan nanoparticles. Significant differences among the treatments are marked with  
 199 different lowercase letters in the absence and presence of *S. litura*, respectively  
 200 (Tukey's HSD test,  $p < 0.05$ ).

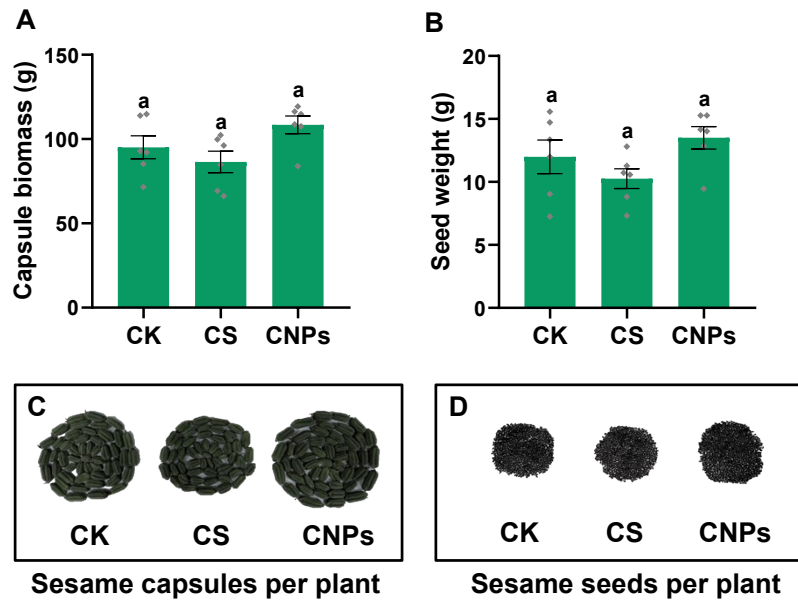

201

202 **Fig. S9** Effect of CS and CNPs on the sesame yield under field condition. (A) Capsule  
203 biomass, (B) seed weight, photos of (C) sesame capsules and (D) seeds per plant.

204 Chitosan treatments include CK, control plants; CS, bulk chitosan; CNPs, chitosan  
205 nanoparticles. Data are means  $\pm$  SE (n = 6). Significant differences among the  
206 treatments are marked with different lowercase letters (Tukey's HSD test,  $p < 0.05$ ).

207

## 208 References

- 209 1. M. S. Sheteiwy, H. Shao, W. Qi, P. Daly, A. Sharma, H. Shaghaleh, Y. A. Hamoud,  
210 M. A. El-Esawi, R. Pan, Q. Wan and H. Lu, Seed priming and foliar  
211 application with jasmonic acid enhance salinity stress tolerance of soybean  
212 (*Glycine max* L.) seedlings, *J. Sci. Food. Agric.*, 2021, **101**, 2027-2041.
- 213 2. J. Liu, L. Gai and H. Zong, Foliage application of chitosan alleviates the adverse  
214 effects of cadmium stress in wheat seedlings (*Triticum aestivum* L.), *Plant.*  
215 *Physiol. Biochem.*, 2021, **164**, 115-121.
- 216 3. Sofy., A. A. Hmed, A. E. M. Alnaggar, R. A. Dawoud, R. F. M. Elshaarawy and M.  
217 R. Sofy, Mitigating effects of bean yellow mosaic virus infection in faba bean  
218 using new carboxymethyl chitosan-titania nanobiocomposites, *Int. J. Biol.*  
219 *Macromol.*, 2020, **163**, 1261-1275.
- 220 4. A. Akcin, The effects of fulvic acid on physiological and anatomical characteristics  
221 of bread wheat (*Triticum aestivum* L.) cv. flamura 85 exposed to chromium  
222 stress, *Soil. Sediment. Contam.*, 2021, **30**, 590-609.
- 223 5. X. Luo, X. Cao, C. Wang, L. Yue, X. Chen, H. Yang, X. Le, X. Zhao, F. Wu, Z.  
224 Wang and B. Xing, Nitrogen-doped carbon dots alleviate the damage from  
225 tomato bacterial wilt syndrome: systemic acquired resistance activation and  
226 reactive oxygen species scavenging, *Environ. Sci. Nano.*, 2021, **8**, 3806-3819.
- 227 6. Y. Li, Z. Tang, Z. Pan, R. Wang, X. Wang, P. Zhao, M. Liu, Y. Zhu, C. Liu, W.  
228 Wang, Q. Liang, J. Gao, Y. Yu, Z. Li, B. Lei and J. Sun, Calcium-mobilizing  
229 properties of salvia miltiorrhiza-derived carbon dots confer enhanced  
230 environmental adaptability in plants, *ACS Nano*, 2022, **16**, 4357-4370.
- 231 7. Z. Wang., J. Tang, L. Zhu, Y. Feng, L. Yue, C. Wang, Z. Xiao and F. Chen,  
232 Nanomaterial-induced modulation of hormonal pathways enhances plant cell  
233 growth, *Environ. Sci. Nano.*, 2022, **9**, 1578-1590.
- 234 8. Z. Wang, X. Le, X. Cao, C. Wang, F. Chen, J. Wang, Y. Feng, L. Yue and B. Xing,  
235 Triiron tetrairon phosphate ( $\text{Fe}_7(\text{PO}_4)_6$ ) nanomaterials enhanced  
236 flavonoid accumulation in tomato fruits, *Nanomaterials*, 2022, **12**, 1341.
- 237 9. L. Wei, H. Zhang, Y. Duan, C. Li, S. Chang, H. Miao and R. Hovav, Transcriptome

- 238 comparison of resistant and susceptible sesame (*Sesamum indicum* L.)  
239 varieties inoculated with *Fusarium oxysporum* f.sp.sesami, *Plant Breeding*,  
240 2016, **135**, 627-635.
- 241 10. J. Murata, E. Ono, S. Yoroizuka, H. Toyonaga, A. Shiraishi, S. Mori, M. Tera, T.  
242 Azuma, A. J. Nagano, M. Nakayasu, M. Mizutani, T. Wakasugi, M. P.  
243 Yamamoto and M. Horikawa, Oxidative rearrangement of (+)-sesamin by  
244 CYP92B14 co-generates twin dietary lignans in sesame, *Nat. Commun.*, 2017,  
245 **8**, 2155.
- 246 11. R. Zhou, Komivi Dossa , Donghua Li , Jingyin Yu , Jun You, Xin Wei and X.  
247 Zhang, Genome-wide association studies of 39 seed yield-related traits in  
248 sesame (*Sesamum indicum* L.), *Int. J. Mol. Sci.*, 2018, **19**, 2794.  
249
